# Supplementary material for: A dual-emission carbon dots/gold nanoclusters fluorescent probe for ratiometric and colorimetric detection of Pb2+ and Hg2+
Source: Royal Society of Chemistry journal article supplement (doi:10.1039/d4ay01638f), 2024-01-01
Supplement: d4ay01638f1.pdf [file d4ay01638f1.pdf]

## Supplementary Information

### **A dual-emission carbon dots/gold nanoclusters fluorescent probe for ratiometric and colorimetric detection of Pb<sup>2+</sup> and Hg<sup>2+</sup>**

Hongxin Cai<sup>a,1</sup>, Yixin Shao<sup>a,1</sup>, Lingling Yan<sup>a,\*</sup>, Hang Yu<sup>a</sup>, Qiang Hu<sup>a,\*</sup>, Yongqiang Wang<sup>a</sup>, Xiude Tu<sup>b</sup>

*<sup>a</sup>School of Physics and Electronic Information Engineering, Henan Polytechnic University,*

*Jiaozuo, 454000, China*

*<sup>b</sup>Wuhan Second Ship Design and Research Institute, Wuhan, 430200, China*

\* Corresponding author: Lingling Yan; [yll@hpu.edu.cn](mailto:yll@hpu.edu.cn) and Qiang Hu; [huqiang@hpu.edu.cn](mailto:huqiang@hpu.edu.cn)

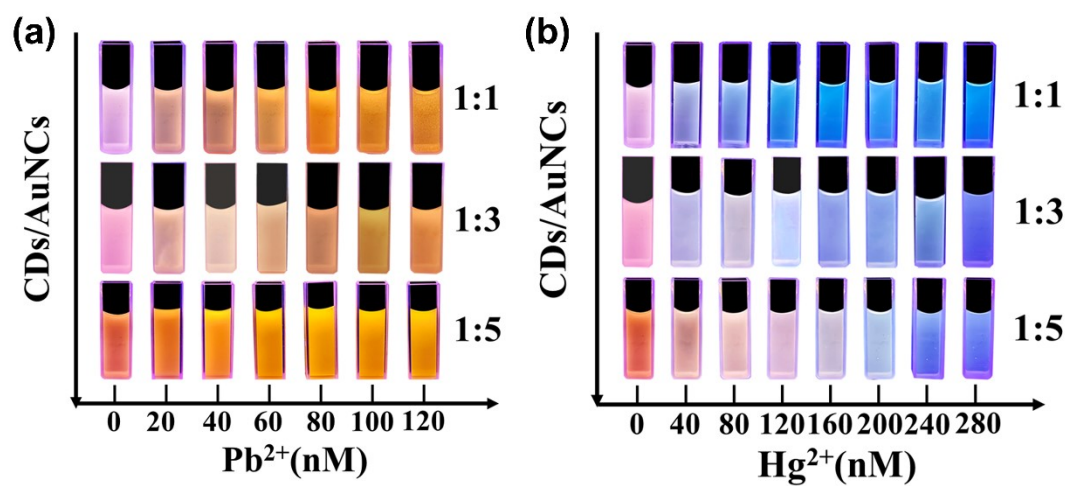

Fig. S1 The fluorescent photographs of the CDs/AuNCs with different volume ratios under a 365 nm UV lamp.

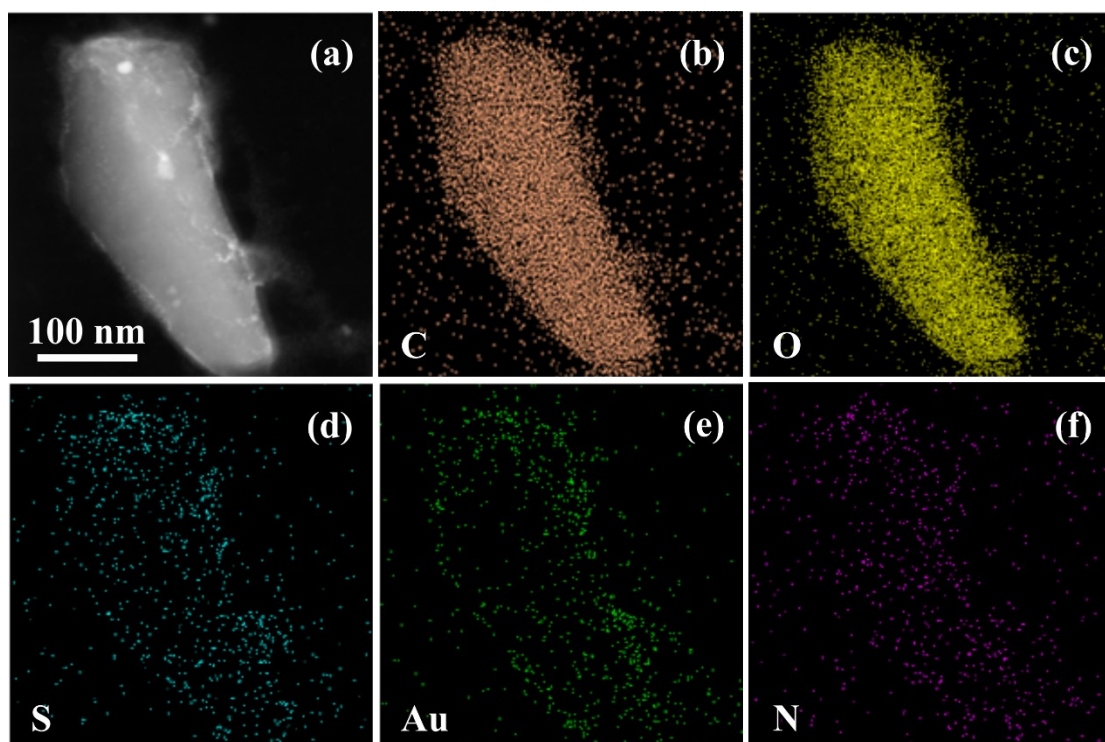

**Fig. S2** (a) TEM image and (b-f) EDAX elemental mapping results of CDs/AuNCs.

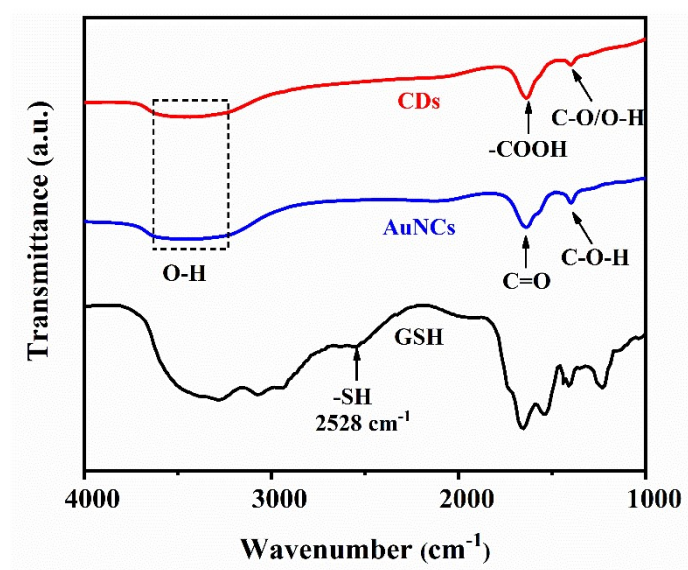

**Fig. S3** FT-IR spectra of CDs, AuNCs, and GSH.

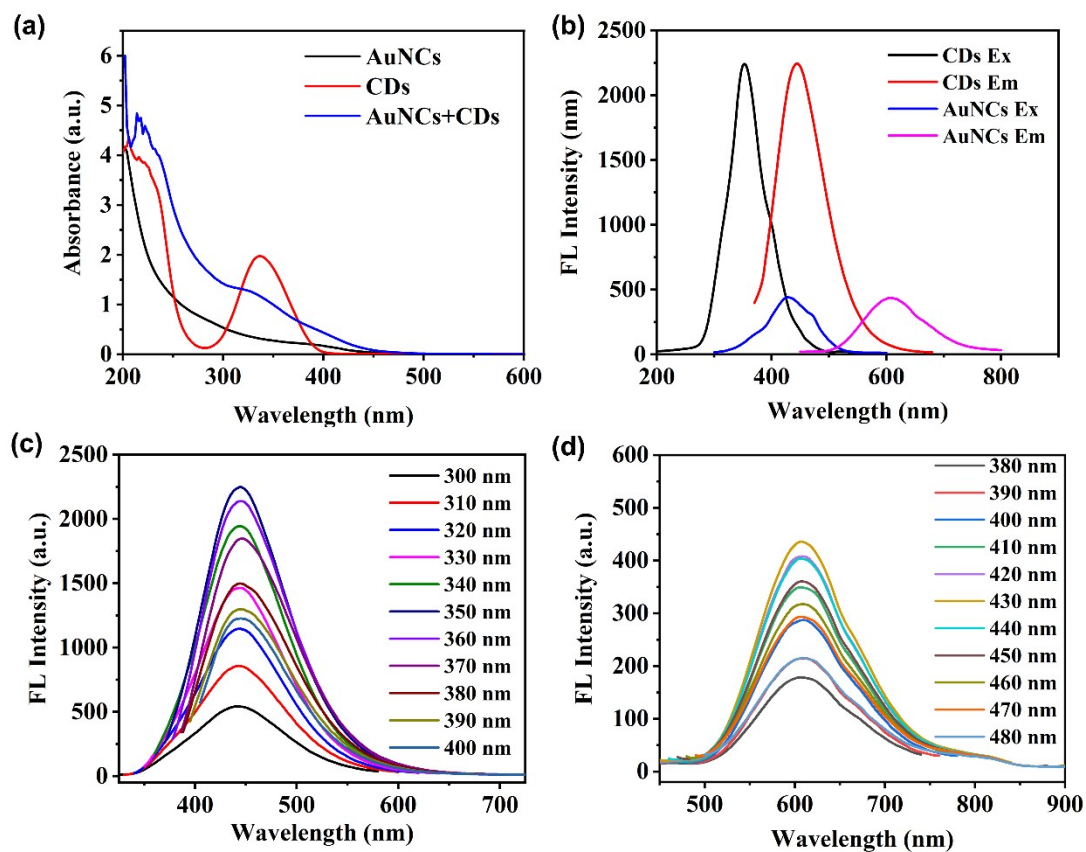

**Fig. S4** (a) UV-Vis absorption spectra of AuNCs, CDs and CDs/AuNCs. (b) Excitation and emission spectra of CDs and AuNCs. Fluorescence spectra of (c) CDs and (d) AuNCs under different excitation wavelengths.

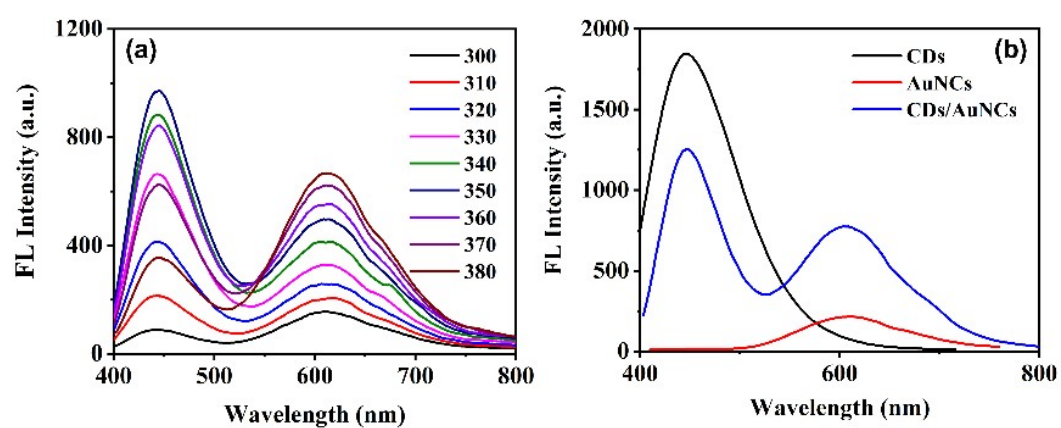

**Fig. S5** (a) Emission spectra of the CDs/AuNCs probe under different excitation wavelengths.  
(b) Fluorescence spectra of CDs, AuNCs and CDs/AuNCs.

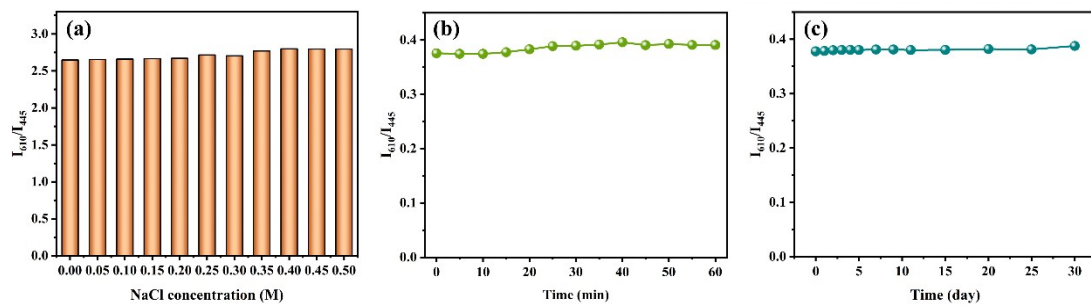

**Fig. S6** (a) Fluorescence intensity of CDs/AuNCs at different NaCl concentrations. (b) Photostability test of CDs/AuNCs with a continuous 365 nm ultraviolet light irradiation. (c) Fluorescence intensity of CDs/AuNC with time. ( $I_{610}$  and  $I_{445}$  denotes the fluorescence intensities of AuNCs and CDs within the probe.)



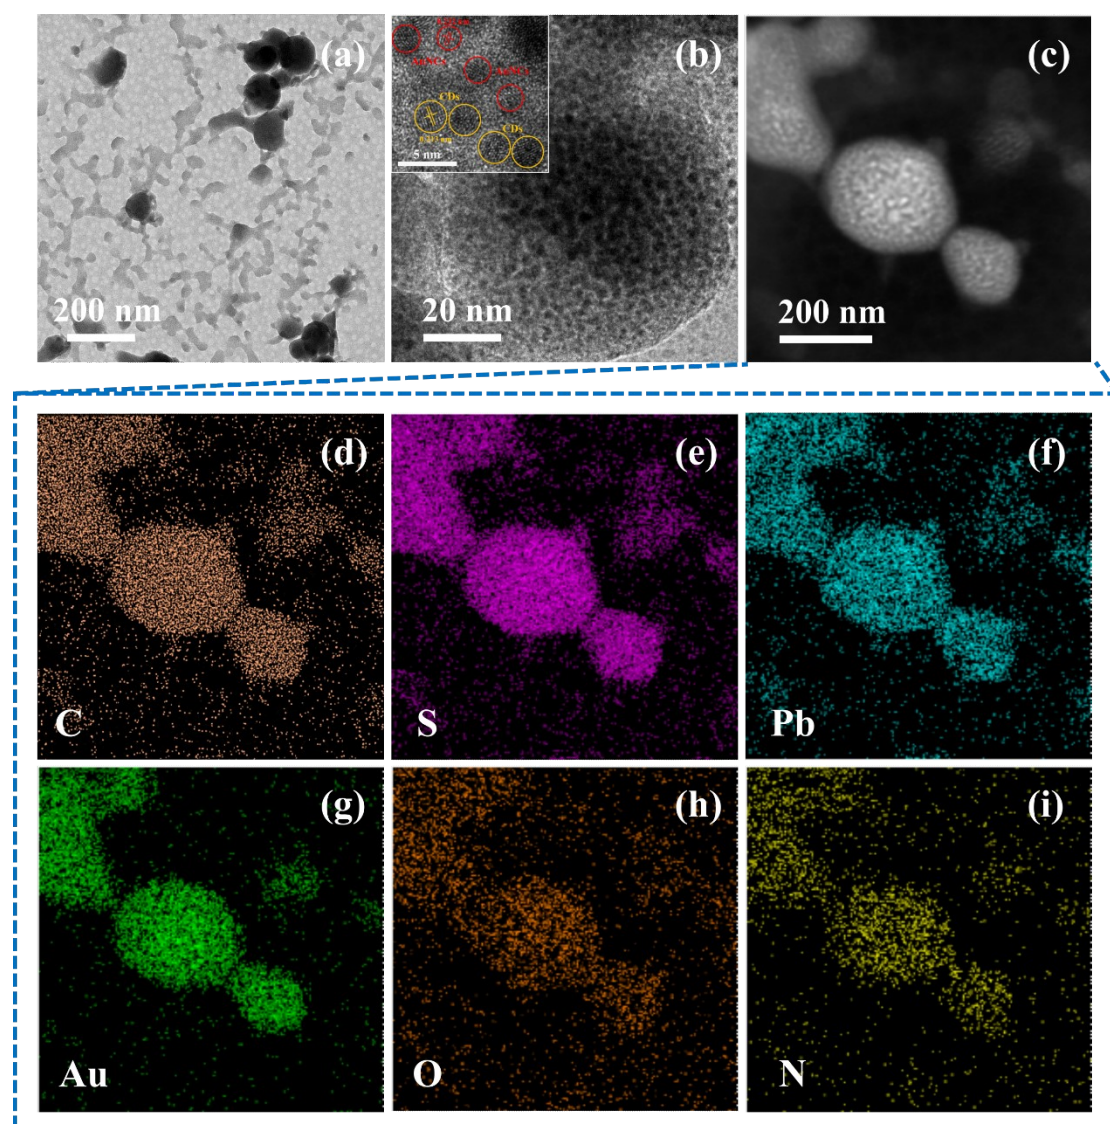

**Fig. S7** (a-c) TEM images and (d-i) EDAX elemental mapping results of CDs/AuNCs after adding  $\text{Pb}^{2+}$ . Inset is HR-TEM image.



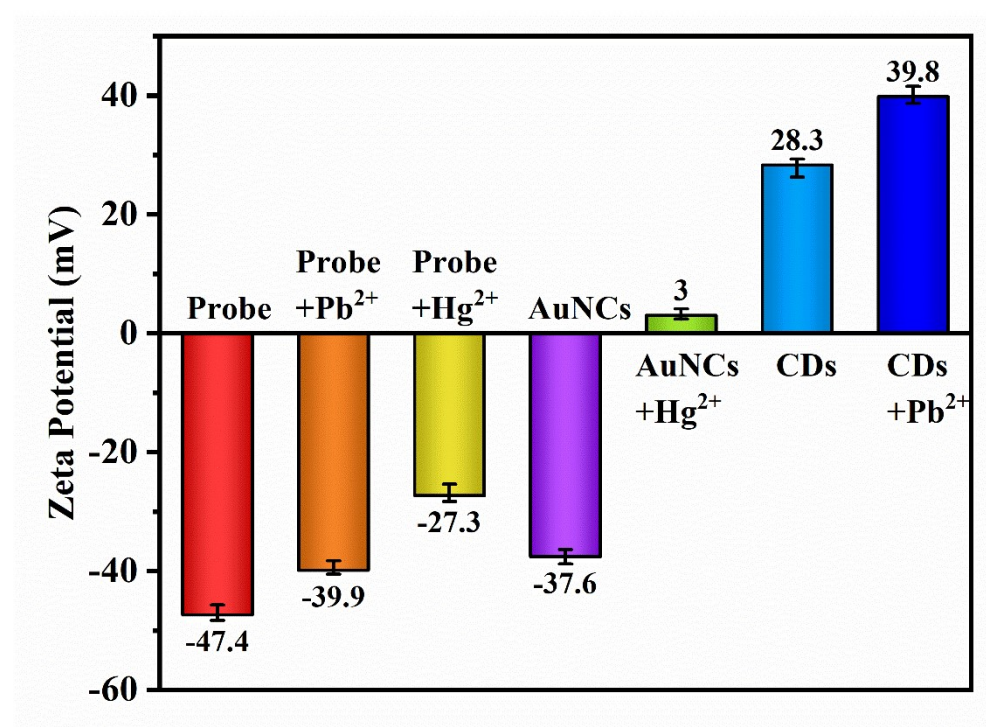

**Fig. S8** Zeta potentials of the CDs/AuNCs probe, the probe with Pb<sup>2+</sup>, the probe with Hg<sup>2+</sup>, AuNCs, AuNCs with Hg<sup>2+</sup>, CDs and CDs with Pb<sup>2+</sup>.

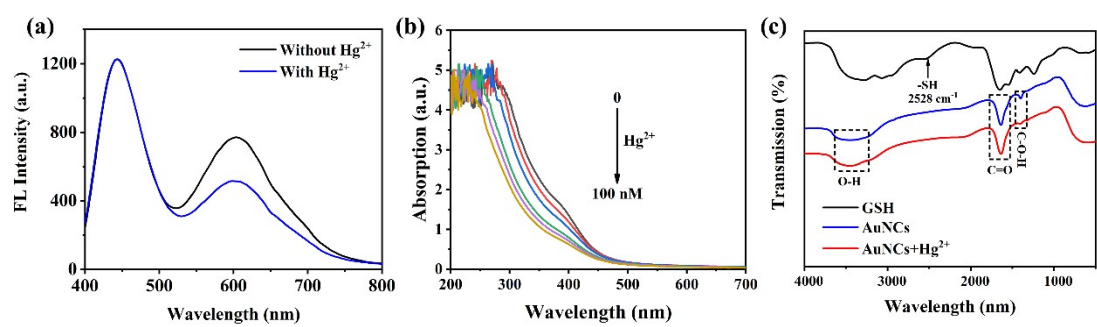

**Fig. S9** (a) Fluorescence spectra the CDs/AuNCs probe with and without  $\text{Hg}^{2+}$ . (b) UV-Vis absorption spectra of AuNCs with different  $\text{Hg}^{2+}$  concentration. (c) FT-IR spectra of GSH and AuNCs in the absence and presence of  $\text{Hg}^{2+}$ .

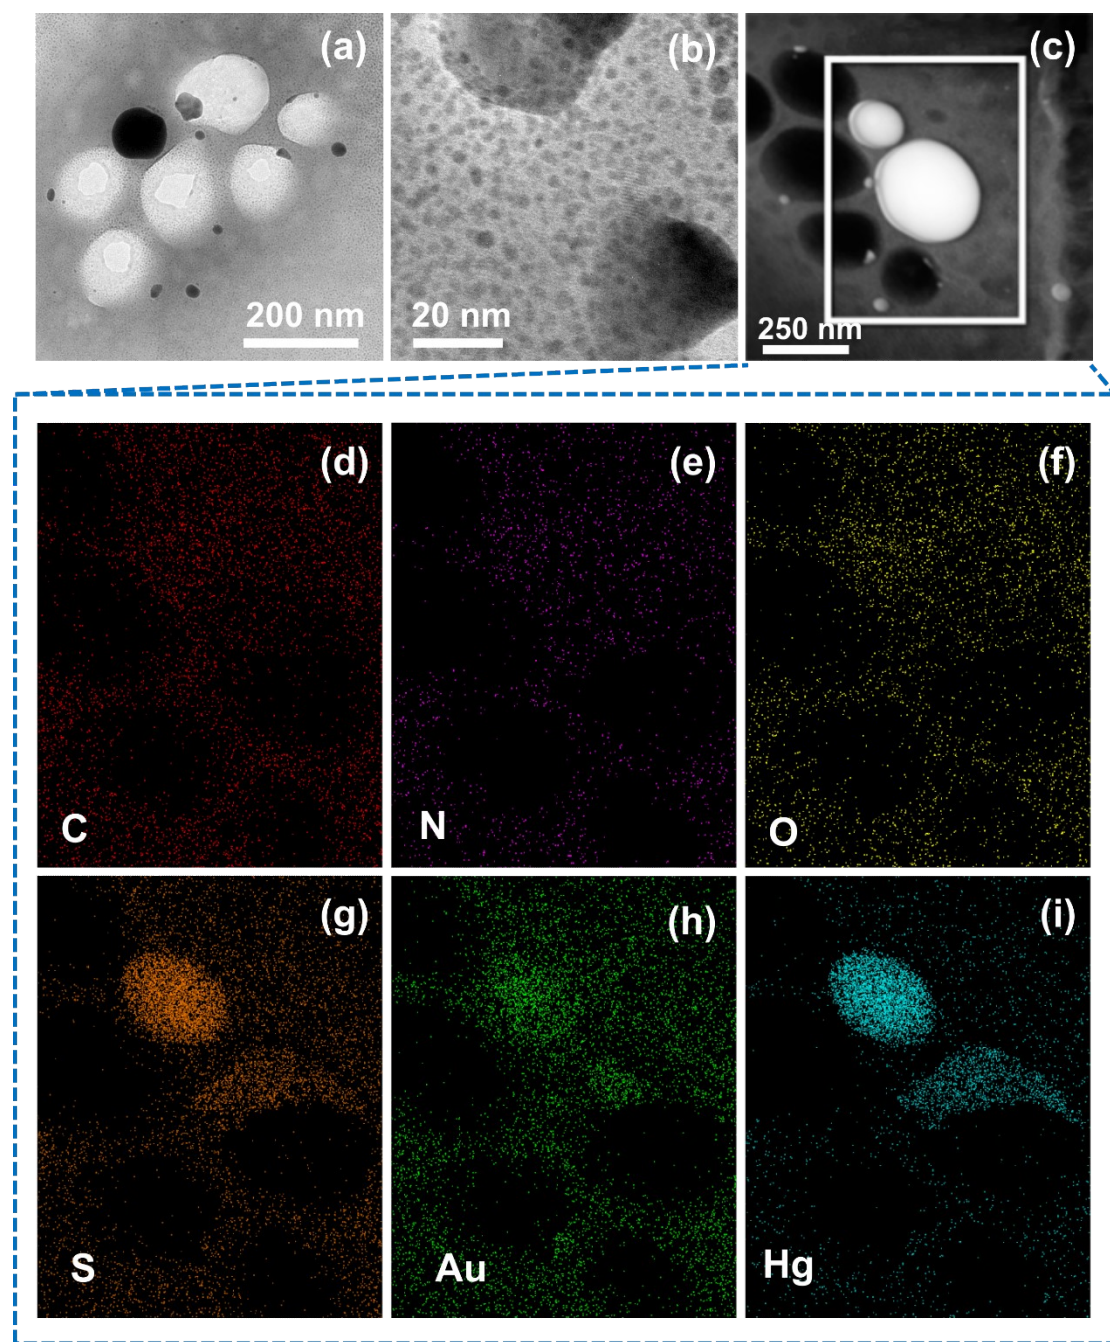

**Fig. S10** (a-c) TEM images and (d-i) EDAX elemental mapping results of CDs/AuNCs after adding  $\text{Hg}^{2+}$ .

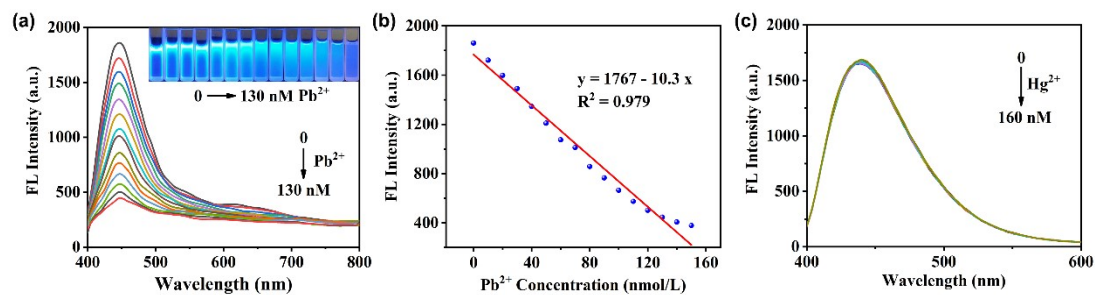

**Fig. S11** (a) Fluorescence spectra of single CDs with different  $\text{Pb}^{2+}$  concentration. Inset: the color transition observed under UV illumination. (b) Correlation between the FL intensity ratio  $I_{610}/I_{445}$  and the concentration of  $\text{Pb}^{2+}$ . (c) Fluorescence spectra of single CDs with different  $\text{Hg}^{2+}$  concentration.

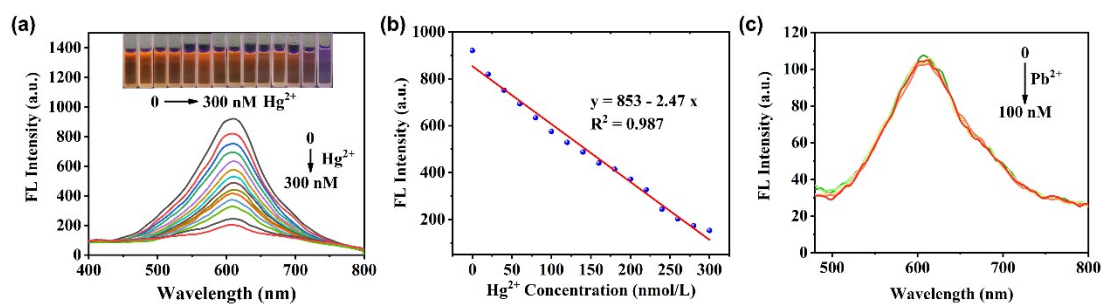

**Fig. S12** (a) Fluorescence spectra of single AuNCs with different  $\text{Hg}^{2+}$  concentration. Inset: the color transition observed under UV illumination. (b) Correlation between the FL intensity ratio  $I_{610}/I_{445}$  and the concentration of  $\text{Hg}^{2+}$ . (c) Fluorescence spectra of single CDs with different  $\text{Pb}^{2+}$  concentration.

| Sample                         | Added (nM) | Found (nM) | Recovery (%) | RSD (%) |
|--------------------------------|------------|------------|--------------|---------|
| Tap water (Pb <sup>2+</sup> )  | 40         | 41.45      | 103.63       | 3.76    |
|                                | 80         | 81.71      | 102.14       | 2.35    |
|                                | 120        | 111.79     | 93.16        | 4.29    |
| Lake water (Pb <sup>2+</sup> ) | 40         | 40.41      | 101.02       | 1.36    |
|                                | 80         | 77.67      | 97.08        | 2.38    |
|                                | 120        | 114.14     | 95.11        | 3.75    |

**Tab. S1** Detection of Pb<sup>2+</sup> in Lake water and tap water samples (n = 3).

| Sample                         | Added (nM) | Found (nM) | Recovery (%) | RSD (%) |
|--------------------------------|------------|------------|--------------|---------|
| Tap water (Hg <sup>2+</sup> )  | 80         | 71.26      | 89.07        | 3.24    |
|                                | 140        | 137.06     | 97.90        | 2.65    |
|                                | 200        | 206.57     | 103.28       | 3.81    |
| Lake water (Hg <sup>2+</sup> ) | 80         | 74.50      | 93.12        | 4.17    |
|                                | 140        | 131.93     | 94.23        | 3.52    |
|                                | 200        | 191.34     | 95.67        | 2.28    |

**Tab. S2** Detection of Hg<sup>2+</sup> in Lake water and tap water samples (n = 3).
